# Supplementary material
Source: HighWire-hosted journal article supplement (http://www.qdcxjkg.com/highwire/filestream/113338/field_highwire_adjunct_files/0/226912de.pdf)
Supplement: 226912de.pdf [file 226912de.pdf]

## Dauertherapie mit Budesonid und Formoterol bei chronisch obstruktiver Lungenkrankheit

P.M. Calverley\*, W. Boonsawat<sup>#</sup>, Z. Cseke<sup>¶</sup>, N. Zhong<sup>+</sup>, S. Peterson<sup>§</sup>, H. Olsson<sup>§</sup>

*Erhaltungstherapie mit Budesonid und Formoterol bei chronisch obstruktiver Lungenkrankheit; P.M. Calverley, W. Boonsawat, Z. Cseke, N. Zhong, S. Peterson, H. Olsson.*  
©ERS Journals Ltd 2003.

**ABSTRACT:** Die Lungenfunktion bei chronisch obstruktiver Lungenkrankheit (COPD) kann durch orale Corticoide und Bronchodilatoren überaus stark verbessert werden. Ob eine klinische Besserung durch eine nachfolgende Inhalationstherapie erhalten werden kann ist nicht bekannt.

COPD-Patienten (n=1022, mittlere prä-bronchodilatatorische Einsekundenatembkapazität (FEV<sub>1</sub>) 36% des Solls) erhielten anfangs 2 Wochen lang Formoterol (9 µg 2 x tgl.) und orales Prednisolon (30 mg 1 x tgl.). Nach dieser Zeit wurden die Patienten für eine Dauer von 12 Monaten in die Gruppen (2 x tgl.) inhalatives Budesonid/Formoterol 320/9 µg, Budesonid 400 µg, Formoterol 9 µg oder Placebo randomisiert.

Der FEV<sub>1</sub>-Wert nach Medikamentengabe verbesserte sich um 0,21 L und die gesundheitsbezogene Lebensqualität stieg gemäß des St George's Respiratory Questionnaire (SGRQ) um 4,5 Punkte nach der Run-in-Periode an. Die Anzahl der Patienten, die die Studie abbrachen, war in der Budesonid/Formoterol-Gruppe im Vergleich zu den Budesonid-, Formoterol- oder Placebo-Gruppen am kleinsten. Die Zeitdauer bis zur ersten Exazerbation (254 versus 96 Tage) war bei den Budesonid/Formoterol-Patienten länger und sie hatten dauerhaft eine höhere FEV<sub>1</sub> (99% versus 87% des Ausgangswerts), beide Primärvariablen versus Placebo. Sie hatten weniger Exazerbationen (1,38 versus 1,80 Exazerbationen pro Patient pro Jahr), hatten einen höheren prä-bronchodilatatorischen Peak Expiratory Flow und zeigten klinisch relevante Verbesserungen in dem SGRQ versus Placebo (-7,5 Punkte). Die Kombination Budesonid/Formoterol war in beiden Primärvariablen wirksamer als jede Komponente in Monotherapie.

Budesonid/Formoterol in einem einzigen Inhalationsgerät (Symbicort®) erhält den Effekt der Behandlungsoptimierung, stabilisiert die Lungenfunktion und verzögert Exazerbationen wirksamer als jede Einzelkomponente des Medikaments oder Placebo.

Eur Respir J 2003; 22: 912–919.

\*University Hospital Aintree, Liverpool, UK. #Srinagarind Hospital, Khon Kaen University, Thailand. ¶Vas Megyei Markusovszky Kórház, Szombathely, Ungarn. +Guangzhou Institute of Respiratory Disease, Guangzhou, China. §AstraZeneca R&D Lund, Lund, Schweden.

Korrespondenz: P.M. Calverley  
Pulmonary and Rehabilitation  
Research Group  
Dept of Medicine  
Clinical Sciences  
University Hospital Aintree  
Longmoor Lane  
Liverpool  
L9 7AL  
UK  
Fax: 44 1515295888  
E-mail: pmacal@liverpool.ac.uk

Schlüsselwörter: Exazerbationen  
Gesundheitsbezogene Lebensqualität  
Gesundheitsstatus  
Inhalative Corticoide  
Langwirksame Beta-2-Agonisten

Eingegangen: 11. März 2003  
Nach Revision angenommen:  
4. Juli 2003

Mehrere randomisierte, kontrollierte Studien haben gezeigt, dass langwirksame inhalative Beta-2-Agonisten die Lungenfunktion bei chronisch obstruktiver Lungenkrankheit (COPD) unabhängig von der Schwere der Erkrankung verbessern [1] und eine Verbesserung der gesundheitsbezogenen Lebensqualität (HRQL) bewirken [2, 3]. Diese Verbesserungen entsprechen oder übertreffen diejenigen, die mit Ipratropium [3] oder Theophyllin [4] festgestellt wurden. Nur in zwei Studien sind die Wirkungen der Behandlung mit langwirksamen inhalativen Beta-2-Agonisten über 1 Jahr untersucht worden [5, 6]. Die Ergebnisse bestätigten die Wirkung auf die Spirometrie, die Veränderung der HRQL war jedoch geringer als erwartet.

Die Rolle von inhalativen Corticoiden (ICS) bei der COPD ist umstrittener. Corticoide scheinen die Abnahmerate bei der Einsekundenatembkapazität (FEV<sub>1</sub>) nicht zu beeinflussen [7-10]. ICS erhöhten jedoch die postbronchodilatatorische FEV<sub>1</sub> in zwei Studien [8, 9] und verringerten die Schwere [11] und die Häufigkeit von Exazerbationen, wenn dieser Endpunkt zuverlässig bewertet werden konnte [9]. Diese Beobachtungen haben zu einer Empfehlung der Anwendung von ICS bei COPD-Patienten mit FEV<sub>1</sub><50% des Solls geführt, die eine spirometrische Reaktion zeigen [12]. In zwei 1-Jahres-Studien wurde die klinische Wirkung

von ICS auf Exazerbationen, die orale Steroide erforderten, bestätigt [5, 6]; die Verringerung der Häufigkeit von Exazerbationen war bei Patienten, die ICS als Monotherapie anwendeten, in der Studie von SZAFRANSKI *et al.* weniger offensichtlich [5]. Diese Ergebnisse lassen möglicherweise darauf schließen, dass stärker erkrankte Patienten mehr als lediglich ICS im Rahmen ihrer COPD-Behandlung benötigen.

Die Kombination eines langwirksamen Beta-2-Agonisten und eines ICS als Erhaltungstherapie erwies sich als sehr erfolgreich bei der Behandlung von Bronchialasthma [13, 14]; bei der Behandlung von COPD ist über diese Behandlungsstrategie weniger bekannt. Die Lungenfunktion (prä-bronchodilatatorische FEV<sub>1</sub>) wird bei der Kombination dieser Medikamente im Vergleich zur Monotherapie [15] verbessert und jüngste Studien haben gezeigt, dass die Kombination der Therapien zudem im Vergleich zu einer Placebo-Behandlung [5, 6] weniger Exazerbationen und eine verbesserte HRQL zur Folge hat.

Patienten mit schwererer COPD (Global Initiative for Obstructive Lung Disease (GOLD) Stufen III und IV) erleiden häufig Exazerbationen, die ihre HRQL beeinträchtigen [16]. Eine Verlängerung der Zeit zwischen den Exazerbationen kann die Verschlimmerung der Krankheit verzögern und zu einer Erhaltung des Gesundheitsstatus beitragen - ein wichtiges Ziel bei der

Behandlung der COPD. Darüber hinaus kann es schwierig sein, die am Anfang einer klinischen Studie aufgrund einer besseren medizinischen Betreuung erreichte Verbesserung des Gesundheitsstatus von der Wirkung der Behandlung selbst zu unterscheiden und dieser Vorbehalt kann die Aussagekraft der Studie hinsichtlich der Bewertung der wahren therapeutischen Wirkung in diesem Ergebnis reduzieren. Um diese Schwierigkeit zu umgehen, wurde eine klinische Studie durchgeführt, bei der inhalatives Formoterol und orale Corticoide während einer kurzen Run-in-Periode verabreicht wurden um sicherzustellen, dass die Behandlung der Patienten vor Eintritt in die Studie optimiert worden ist. Während der 12-monatigen randomisierten Behandlungsdauer von Patienten mit COPD wurde eine in einem einzigen Inhalationsgerät verabreichte Kombination aus ICS (Budesonid) und einem langwirksamen Beta-2-Agonisten (Formoterol) mit den als Monotherapie verabreichten Einzelkomponenten und mit Placebo verglichen. Die primären Endpunkte waren die Zeit bis zur ersten Exazerbation und die Veränderung der FEV<sub>1</sub>. Zudem wurden Daten über die HRQL, den Peak Expiratory Flow (PEF), die Symptome, die Anwendung von Akutmedikation und unerwünschte Ereignisse (AE) erhoben. Dieses Protokoll ermöglichte es den Autoren, eine klinisch relevante Situation zu testen, nämlich ob die kurzfristige Besserung im Anschluss an eine Zeit der Optimierung der Behandlung über einen längeren Zeitraum durch eine Inhalationstherapie aufrecht erhalten werden kann, und zu untersuchen, welche Arzneimittel welchen Aspekt des Wohlergehens des Patienten ändern können.

### Methoden

#### Patienten

Ambulante Patienten mit COPD (GOLD Stufen III und IV) [12] wurden auf Grundlage folgender Kriterien angeworben: Alter  $\geq 40$  Jahre, COPD-Symptome für  $> 2$  Jahre, Raucherhistorie von  $\geq 10$  Packungsjahren, FEV<sub>1</sub>/Vitalkapazität (VK)  $\leq 70\%$  Prä-bronchodilatator, FEV<sub>1</sub>  $\leq 50\%$  des prognostizierten Normalwertes Prä-bronchodilatator, Nutzung von inhalativen Bronchodilatoren als lindernde Arzneimittel,  $\geq 1$  COPD Exazerbation, die eine Behandlung mit oralen Corticoiden und/oder Antibiotika 2-12 Monate vor dem ersten Klinikbesuch erforderte.

Prinzipielle Ausschlusskriterien waren: eine Historie mit Asthma/saisonabhängiger Rhinitis allergica vor dem Alter von 40 Jahren, jegliche relevante kardiovaskuläre Erkrankungen oder andere schwere Erkrankungen/Krankheiten, die die Patienten einem Risiko aussetzen oder die Ergebnisse der Studie beeinflussen könnten, eine COPD-Exazerbation mit der Notwendigkeit einer medizinischen Behandlung innerhalb von vier Wochen vor der Anmeldung und/oder während der Run-in-Periode, die Anwendung einer Sauerstofftherapie, von Beta-Blockern oder von unzulässigen Medikamenten. Alle Patienten wurden informiert und haben schriftlich ihre Zustimmung gegeben und die Studie wurde von einer Ethikkommission für jedes Zentrum genehmigt.

#### Studiendesign

Es handelte sich um eine randomisierte, placebokontrollierte Doppelblindstudie mit Parallelgruppen, an der sich 109 Zentren in 15 Ländern beteiligten. Alle Arzneimittel stammten von AstraZeneca, Lund, Schweden, und wurden mittels eines Trockenpulverinhalationsgerätes (Turbuhaler®; AstraZeneca) verabreicht. Während der 2-wöchigen Run-in-Periode erhielten die Patienten oral Prednisolon (30 mg) *1 x tgl.* und inhalatives Formoterol (Oxis®)  $2 \times 4,5 \mu\text{g}$  *2 x tgl.*, und Terbutalin (Bricanyl®) 0,5 mg nach Bedarf. Die Patienten wurden anschließend randomisiert für die 12-monatige Behandlung mit entweder Budesonid (Pulmicort®)  $2 \times 200 \mu\text{g}$  *2 x tgl.*, Formoterol  $2 \times 4,5 \mu\text{g}$  *2 x tgl.*, Budesonid/Formoterol (Symbicort®; dieser Turbuhaler® liefert die gleich Menge an Budesonid und Formoterol wie die entsprechenden Turbuhaler® Monoprodukte)  $2 \times 160/4,5 \mu\text{g}$  *2 x tgl.*,

oder Placebo (Laktose Monohydrat) *2 x tgl.* mit Terbutalin 0,5 mg nach Bedarf.

Bestimmte Arzneimittel waren, mit Einschränkungen, nach der Randomisierung zulässig. Im Falle von Exazerbationen waren Therapien mit oralen Corticoiden (maximal 3 Wochen je Verlauf) und Antibiotika erlaubt. Parenterale Steroide und/oder Spraybehandlungen (Einzelinjektionen/Inhalationen) waren bei Notfallbesuchen zulässig.

Folgende Medikamente waren nach der Anwerbung nicht zulässig: inhalative Steroide (mit Ausnahme der Medikamente der Studie), Natrium-Cromoglykat, Leukotrien-Antagonisten oder 5-Lipoxygenase (5-LO) Inhibitoren, Bronchodilatoren (mit Ausnahme der in der Studie verwendeten und Terbutalin 0,5 mg (Bricanyl®) nach Bedarf), Antihistamine, alle Arzneimittel, die Ephedrin und Beta-Blocker enthalten, einschließlich Augentropfen.

Die folgenden Medikamente wurden vor der Anwerbung entzogen: kurzwirksame inhalative oder orale Beta-2-Agonisten (6 h zuvor), inhalative oder orale langwirksame Beta-2-Agonisten (48 h), inhalative kurzwirksame Anticholinergica (8 h), inhalative langwirksame Anticholinergica (7 Tage), Xanthin-enthaltende Derivative *1 x tgl.* (48 h), Xanthin-enthaltende Derivative *2 x tgl.* (24 h), Leukotrien-Antagonisten oder 5-LO Inhibitoren (48 h).

#### Bewertungen

Die Patienten kamen bei Anwerbung, Randomisierung und nach 1, 2, 3, 6, 9 und 12 Monaten der Behandlung in die Kliniken. Die Primärvariablen waren die Zeit bis zur ersten Exazerbation und die Veränderung der FEV<sub>1</sub> nach Medikamentengabe. Die Sekundärvariablen betrafen die Zahl der Exazerbationen, die Zeit bis zu und die Anzahl der Episoden der Behandlung mit oralen Corticoiden, PEF am Morgen und am Abend, langsame VK, HRQL, Symptome, Anwendung von Akutmedikamenten und AEs.

Exazerbationen, die eine medizinische Behandlung (orale Antibiotika und/oder Corticoide oder Hospitalisierungen) erforderten, wurden bei jedem Besuch nach der Randomisierung aufgezeichnet. Die Zeit bis und die Anzahl der Exazerbationen sowie die Behandlungsepisoden mit oralen Corticoiden wurden analysiert.

Die prognostizierte FEV<sub>1</sub> wurde bei Anwerbung mit Hilfe der Gleichungen der European Respiratory Society (ERS) [17] berechnet. Die FEV<sub>1</sub> wurde vor und 15 Minuten nach zwei Inhalationen Terbutalin 0,5 mg gemessen und der prozentuale Anstieg der FEV<sub>1</sub> von der Baseline wurde berechnet. Die Spirometrie (FEV<sub>1</sub> und langsame VK), die nach der Gabe der Medikamente im Rahmen der Studie und mindestens 6 h nach einem Akutmedikament bei jedem Klinikbesuch gemessen wurde, erfüllte die ERS-Standards [17]. Wann immer möglich wurde die Spirometrie zur gleichen Tageszeit, unter Verwendung des gleichen Spirometers (kalibriert an jedem Studientag in Übereinstimmung mit der Handelsspezifikation), und überwacht durch das gleiche gut ausgebildete Studienpersonal, durchgeführt. Die Patienten wurden angewiesen, 15 Minuten vor der Durchführung der Messung und der Spirometrie in sitzender Position zu ruhen und dabei eine Nasenklammer zu tragen. Alle Spirometer hielten die Empfehlungen der American Thoracic Society ein oder übertrafen diese.

Der prä-bronchodilatatorische PEF, gemessen mit Hilfe eines Mini-Wright® Peak Flow – Messgeräts (Clement Clark, Harlow, UK) wurde täglich in einem Tagebuch am Morgen und am Abend als bester von drei Versuchen vor der Inhalation der Medikamente der Studie aufgezeichnet.

Der St George's Respiratory Questionnaire (SGRQ) [18] wurde zur Bewertung der HRQL verwendet. Die Fragebögen wurden bei der Anwerbung, bei der Randomisierung und nach 6 und 12 Monaten ausgefüllt und ein Gesamtscore wurde berechnet. Ein geringerer Score ist ein Zeichen für einen besseren Gesundheitsstatus, während eine Änderung von  $\geq 4$  Punkten das Zeichen für eine minimale klinisch für den Patienten bedeutende Differenz ist [19]. Symptome wie Kurzatmigkeit, Husten, Engegefühl im Brustraum und nächtliches Erwachen (auf einer

5-stufigen Skala von 0 (keine, Symptome nicht bewusst) bis 4 (schwere)), ebenso wie die Anwendung von Aktumedikamenten wurden täglich in einem Patiententagebuch aufgezeichnet. Die AEs wurden bei jedem Besuch nach Randomisierung durch Stellen einer Standardfrage überwacht.

### Analyse

Bei 150 Patienten je Gruppe könnte eine Differenz in den Überlebenskurven mit 80% Wahrscheinlichkeit entdeckt werden, wenn 66% in der Referenzgruppe und 50% in der Vergleichsgruppe exazerbierten. Eine Einstellung auf eine 35%ige Ausfallrate impliziert ~230 Patienten je Gruppe.

Eine Intention-to-Treat-Analyse wurde verwendet und die gesamte hypothetische Prüfung erfolgte mit zweiseitigen Alternativ-Hypothesen;  $p < 0,05$  wurde als statistisch bedeutend betrachtet. Die Zeit bis zur ersten Exazerbation wurde mit Hilfe eines Log-Rank-Tests analysiert und durch Hazard Rates in einem Cox-Proportional Hazard Modell, mit der Behandlung als Faktor und nach Ländern zugeordnet, analysiert. Die Zahl der Exazerbationen wurde mittels eines Poisson-Regressionsmodells (ausgedrückt als Durchschnittsrate, d.h. durchschnittliche Zahl von Exazerbationen pro Patient pro Jahr) analysiert. Die Behandlung und das Land wurden als Faktoren verwendet, die Zeit in der Studie als eine Ausgleichsvariable und Sicherheitsintervalle wurden der Überdispersion angepasst. Behandlungen mit oralen Corticoiden wurden ähnlich der Exazerbationen analysiert. Die FEV<sub>1</sub>- und VK-

Endpunkte waren der Durchschnitt aller verfügbaren Messungen während der Behandlungsdauer, analysiert in einer multiplikativen Varianzanalyse (mit Logarithmus der Werte) mit der Behandlung und dem Land als Faktoren und dem Wert aus der Randomisierung als Kovarianz. Die Durchschnittsverhältnisse wurden als prozentuale Erhöhungen dargestellt. Beide Primärvariablen mussten eine statistische Signifikanz am 5% Niveau ergeben, um das Gesamt-Signifikanzniveau auf 5% in der Schlussfolgerung [20] zu halten. Differenzen in der Reaktion der Untergruppen wurden mit Hilfe von standardisierten "Behandlung nach Untergruppe"-Interaktionsanalysen angegangen. Der SGRQ wurde ähnlich wie die FEV<sub>1</sub> analysiert, jedoch auf Grundlage der letzten verfügbaren Messung bei Behandlung. Die Variablen auf den Diary-Cards wurden ebenfalls in ähnlicher Weise wie FEV<sub>1</sub> analysiert, jedoch mit einem Additivmodell.

### Ergebnisse

#### Patienten

Von 1141 in die Studie aufgenommenen Patienten brachen 119 (10%) während der Run-in-Periode ab; 26% von ihnen aufgrund einer Verschlimmerung der COPD und 24% aufgrund von anderen AEs (nicht COPD-Verschlimmerung). Nach der Run-in-Periode wurden 1022 Patienten randomisiert; 629 von ihnen (62%) schlossen die Studie ab (Tabelle 1). Mittlere demographische und Baseline-Charakteristika waren in allen Behandlungsgruppen ähnlich (Tabelle 2) und entsprechen im Allgemeinen den GOLD Stufen III und IV COPD [12]. Nach der anfänglichen Periode der

**Tabelle 1 – Patientenfluss und Abbrüche**

|                                                                                                        | B/F      | B         | F        | Placebo   | Gesamt     |
|--------------------------------------------------------------------------------------------------------|----------|-----------|----------|-----------|------------|
| Aufgenommene Patienten                                                                                 |          |           |          |           | 1141       |
| Patienten, die während der Run-in-Periode abbrechen                                                    |          |           |          |           | 119        |
| Randomisierte Patienten                                                                                | 254      | 257       | 255      | 256       | 1022       |
| Patienten, die nach der Randomisierung abbrechen#                                                      | 74 (29)  | 102 (40)  | 111 (44) | 106 (41)  | 393 (38)   |
| Patienten, die wegen einer COPD-Verschlimmerung abbrechen <sup>†</sup>                                 | 28 (11)  | 46 (18)   | 59 (23)  | 60 (23)   | 193 (19)   |
| Patienten, die wegen eines unerwünschten Ereignisses (mit Ausnahme der COPD-Verschlimmerung) abbrechen | 20 (8)   | 21 (8)    | 20 (8)   | 11 (4)    | 72 (7)     |
| Patienten verloren nach Nachuntersuchung                                                               | 0 (0)    | 2 (0,8)   | 3 (1,2)  | 3 (1,2)   | 8 (0,8)    |
| Auswahlkriterien nicht erfüllt                                                                         | 4 (1,6)  | 4 (1,6)   | 4 (1,6)  | 6 (2,3)   | 18 (1,8)   |
| Sonstige Gründe                                                                                        | 22 (8,7) | 29 (11,3) | 25 (9,8) | 26 (10,2) | 102 (10,0) |
| Patienten, die die Studie abschlossen                                                                  | 180 (71) | 155 (60)  | 144 (56) | 150 (59)  | 629 (62)   |

Daten werden, soweit nicht anders angegeben, als n (% der randomisierten Patienten pro Gruppe) dargestellt. B: Budesonid; F: Formoterol; COPD: chronisch obstruktive Lungenerkrankung. #:  $p=0,001$  Budesonid/Formoterol versus Placebo,  $p=0,037$  Budesonid/Formoterol versus Budesonid,  $p<0,001$  Budesonid/Formoterol versus Formoterol,  $p=0,223$  Budesonid versus Placebo,  $p=0,950$  Formoterol versus Placebo (Cox-Proportional Hazard Modell); †:  $p<0,001$  Budesonid/Formoterol versus Placebo und versus Formoterol,  $p=0,038$  Budesonid/Formoterol versus Budesonid,  $p=0,031$  Budesonid versus Placebo,  $p=0,616$  Formoterol versus Placebo (Cox-Proportional Hazard Modell).

**Tabelle 2 – Demographische und Baseline-Charakteristika (bei Aufnahme, sofern nicht anders angegeben)**

|                                                                 | B/F         | B           | F           | Placebo     |
|-----------------------------------------------------------------|-------------|-------------|-------------|-------------|
| Randomisierte Patienten n                                       | 254         | 257         | 255         | 256         |
| Männlich %                                                      | 78          | 74          | 75          | 75          |
| Durchschnittsalter in Jahren                                    | 64 (42–86)  | 64 (41–85)  | 63 (41–84)  | 65 (43–85)  |
| Derzeit Raucher %                                               | 33          | 39          | 36          | 30          |
| Packungsjahre                                                   | 39 (10–240) | 39 (10–150) | 38 (10–120) | 39 (10–150) |
| Frühere Medikation % der Patienten                              |             |             |             |             |
| ICS                                                             | 47          | 51          | 48          | 46          |
| Inhalative SABAs                                                | 52          | 49          | 53          | 48          |
| Anticholinergika                                                | 29          | 30          | 30          | 32          |
| Inhalative LABAs                                                | 31          | 30          | 30          | 25          |
| Xanthine                                                        | 37          | 33          | 40          | 36          |
| Inhalationskombination aus Beta-2-Agonist und Anticholinergikum | 16          | 18          | 18          | 22          |
| FEV <sub>1</sub> L                                              | 0,98±0,33   | 0,99±0,33   | 1,00±0,32   | 0,98±0,33   |
| FEV <sub>1</sub> % prognostiziert                               | 36±10       | 36±10       | 36±10       | 36±10       |
| FEV <sub>1</sub> /VK %                                          | 42±12       | 44±12       | 44±12       | 44±11       |
| Reversibilität % prognostiziert                                 | 6±7         | 6±7         | 6±6         | 6±6         |
| Baseline SGRQ-Gesamtscore bei Randomisierung                    | 48±19       | 49±18       | 47±19       | 48±18       |

Daten werden, sofern nicht anders angegeben, als mittlerer (Bereich) oder Durchschnitt±SD dargestellt. B: Budesonid; F: Formoterol; ICS: inhalatives Corticoid; SABA: kurzwirksamer Beta-2-Agonist; LABA: langwirksamer Beta-2-Agonist; FEV<sub>1</sub>: Einsekundenausatemkapazität; VK: Vitalkapazität; SGRQ: St George's Respiratory Questionnaire.

Optimierung der Behandlung war die durchschnittliche FEV<sub>1</sub> der Gruppe um (Durchschnitt±SD) 0,21±0,32 L angestiegen und der SGRQ-Gesamtscore verringerte sich um 4,5±10,7 Punkte.

**Abbruch der Studie**

Die Budesonid/Formoterol-Gruppe hatte im Vergleich zu den Placebo-, Budesonid- und Formoterol-Gruppen ein geringeres Risiko des Abbruchs der Studie (Tabelle 1). Es gab keine deutlichen Unterschiede in den Abbruchraten in der Budesonid- oder der Formoterol-Gruppe versus der Placebo-Gruppe.

Nach der Randomisierung schieden 393 Patienten aus der Studie aus: 193 wegen einer COPD-Verschlimmerung, 72 wegen anderer AEs (nicht COPD-Verschlimmerung) und 128 aus anderen Gründen (Tabelle 1). Deutlich weniger Abbrüche aufgrund einer Verschlimmerung der COPD wurden in der Budesonid/Formoterol-Gruppe im Vergleich zu den Gruppen Placebo, Budesonid und Formoterol (Tabelle 1) verzeichnet.

**Exazerbationen**

Budesonid/Formoterol verlängerte die Zeit bis zur ersten Exazerbation im Vergleich zu allen anderen Behandlungen (alle p<0,05, Log-Rank-Test; Abb. 1). Die Hazard Rate - Analyse hat gezeigt, dass sich das Risiko einer Exazerbation während einer Therapie mit Budesonid/Formoterol um 22,7%, 29,5% und 28,5%

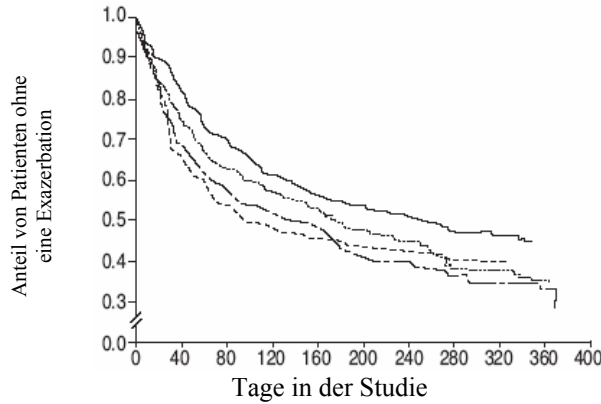

Abb. 1. – Kaplan-Meier-Plot der Zeit bis zur ersten Exazerbation je Behandlungsgruppe. Log-Rank-Tests von Budesonid/Formoterol (—) versus Budesonid (.....), p=0,037; Budesonid/Formoterol versus Formoterol (— · —), p=0,002; Budesonid versus Placebo (- - -), p=0,796; Formoterol versus Placebo, p=0,490; und Budesonid/Formoterol versus Placebo, p<0,05.

versus Budesonid, Formoterol beziehungsweise Placebo verringerte. Die Exazerbationsrate mit Budesonid/Formoterol verringerte sich im Vergleich zu Placebo (23,6%) und Formoterol (22,5%) jedoch nicht gegenüber Budesonid als Monotherapie (13,6%) (Tabelle 3). Keines von den beiden Exazerbationsmaßen wurde durch Budesonid oder Formoterol im Vergleich zu Placebo beeinträchtigt.

Bei Beschränkung der Analyse auf orale Corticoide, die aufgrund von Exazerbationen verabreicht wurden, wurden die niedrigsten Raten in der Budesonid/Formoterol- und der Budesonid-Behandlungsgruppe verzeichnet (Tabelle 3). Budesonid/Formoterol verlängerte die Zeit bis zur ersten Verabreichung von oralen Corticoiden nach der Randomisierung;

**Tabelle 3 – Analyse von Exazerbationen und Behandlungen mit oralen Corticoiden aufgrund von Exazerbationen**

|                                                                      | B/F    | B                    | F                     | Placebo             |
|----------------------------------------------------------------------|--------|----------------------|-----------------------|---------------------|
| Zeit bis zur ersten Exazerbation                                     |        |                      |                       |                     |
| Mittlere Anzahl von Tagen                                            | 254    | 178                  | 154                   | 96                  |
| #RR (95% CI) B/F versus andere Gruppen <sup>†</sup>                  |        | 0,773 (0,611–0,980)* | 0,705 (0,558–0,891)** | 0,715 (0,562–0,910) |
| p-Wert <sup>‡</sup>                                                  | 0,006  | 0,512                | 0,901                 |                     |
| Gesamtzahl der Exazerbationen                                        |        |                      |                       |                     |
| Durchschnittsrate pro Patient pro Jahr                               | 1,38   | 1,60                 | 1,85                  | 1,80                |
| RR (95% CI) B/F versus andere Gruppen <sup>†</sup>                   |        | 0,864 (0,679–1,100)  | 0,745 (0,587–0,945)*  | 0,764 (0,600–0,973) |
| p-Wert <sup>‡</sup>                                                  | 0,029  | 0,308                | 0,828                 |                     |
| Exazerbationen, die die Anwendung von oralen Corticoiden erforderten |        |                      |                       |                     |
| Durchschnittsrate pro Patient pro Jahr                               | 0,63   | 0,87                 | 0,91                  | 1,14                |
| RR (95% CI) B/F versus andere Gruppen <sup>†</sup>                   |        | 0,718 (0,543–0,949)* | 0,695 (0,523–0,923)*  | 0,553 (0,420–0,728) |
| p-Wert <sup>‡</sup>                                                  | <0,001 | 0,044                | 0,085                 |                     |

B: Budesonid; F: Formoterol; RR: Rate Ratio, CI: Sicherheitsintervall. <sup>†</sup>: ein RR von 0,715 stellt eine Verringerung der Rate von 28,5% dar, <sup>‡</sup>: versus Placebo; <sup>\*</sup>: Raten des Poisson-Regressionsmodells, RR ist der Hazard Ratio aus dem Cox-Proportional Hazard Modell. <sup>\*</sup>: p<0,05 zu Gunsten Budesonid/Formoterol; <sup>\*\*</sup>: p<0,01 zu Gunsten Budesonid/Formoterol.

die Verringerung des Risikos betrug 32,7% und 33,8% versus Budesonid beziehungsweise Formoterol (beide p<0,01), und 42,3% versus Placebo (p<0,001). Budesonid/Formoterol verringerte zudem die Anwendungsrate oraler Corticoide um 28,2%, 30,5% und 44,7% versus Budesonid, Formoterol bzw. Placebo; Budesonid in Monotherapie verringerte die Zahl der Behandlungen mit oralen Corticoiden verglichen mit Placebo, Formoterol jedoch nicht (Tabelle 3).

**Lungenfunktion**

Nach der Optimierungsperiode wurde die während der Run-in-Phase verzeichnete Verbesserung der FEV<sub>1</sub> bei einer Budesonid/Formoterol-Behandlung im Laufe der Studie erhalten. Im Gegensatz dazu nahm die FEV<sub>1</sub> bei allen anderen Behandlungen deutlich und schnell ab. Diese Differenz war bedeutend bei Budesonid/Formoterol verglichen mit Placebo (14%), Budesonid (11%) und Formoterol (5%), und mit Formoterol versus Placebo (8%), jedoch nicht mit Budesonid versus Placebo (2%) (Abb. 2).

Die Änderungen der VK entsprachen in großem Maße denen der FEV<sub>1</sub>. Budesonid/Formoterol und Formoterol verbesserten die VK versus Placebo (beide p<0,001), während Budesonid/Formoterol auch die VK versus Budesonid (p<0,001) verbesserte. Die Kombinationstherapie mit Budesonid/Formoterol war zudem verbunden mit einem höheren PEF am Morgen verglichen mit allen anderen Behandlungen, und einem höheren PEF am Abend im Vergleich zu Placebo und Budesonid (Abb.3).

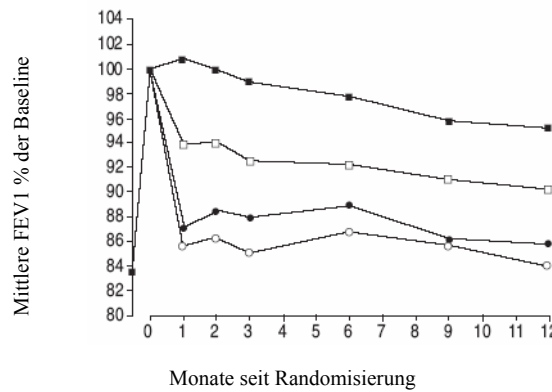

Abb. 2. – Änderungen der Einsekundenatembkapazität (FEV1) in den vier Behandlungsgruppen ab Randomisierung bis zum Durchschnitt aller verfügbaren Messungen während der 12-monatigen Behandlungsdauer. Budesonid/Formoterol (■) versus Budesonid (●), p<0,001; Budesonid/Formoterol versus Formoterol (□), p=0,002; Budesonid versus Placebo (○), p=0,145; Formoterol versus Placebo, p<0,001; Budesonid/Formoterol versus Placebo, p<0,001.

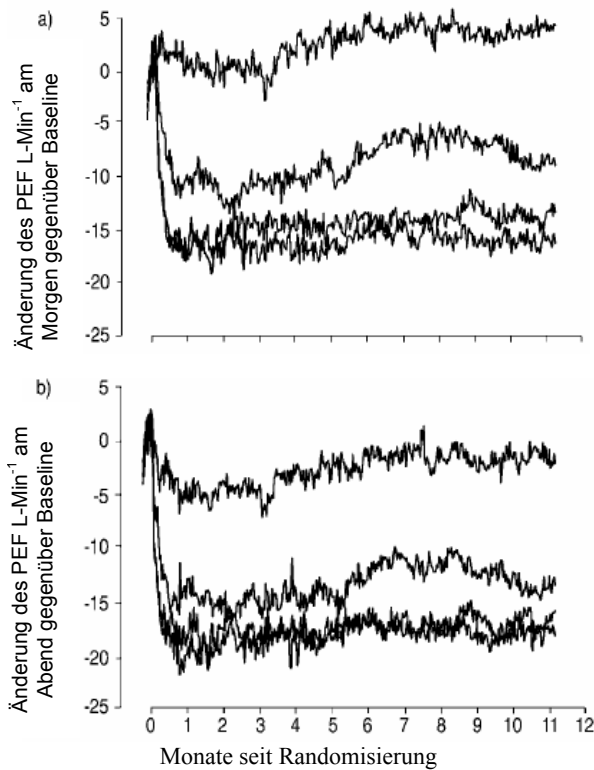

Abb. 3 – Änderung des Peak Expiratory Flow (PEF) von der Randomisierung bis zum Durchschnitt aller verfügbaren Messungen während der 12-monatigen Behandlungsdauer (von den täglichen Diary-Card-Daten). Die Kombinationstherapie Budesonid/Formoterol (oberste Linie) war verbunden mit a) höheren PEF am Morgen *versus* Placebo (untere Linie;  $18 \text{ L}\cdot\text{min}^{-1}$  Differenz,  $p<0,001$ ), Budesonid (dritte Linie von oben;  $15 \text{ L}\cdot\text{min}^{-1}$ ,  $p<0,001$ ) und Formoterol (zweite Linie von oben;  $7 \text{ L}\cdot\text{min}^{-1}$ ,  $p=0,007$ ). Formoterol *versus* Placebo  $p<0,001$ . b) Die Kombinationstherapie Budesonid/Formoterol war verbunden mit höheren PEF am Abend *versus* Placebo ( $14 \text{ L}\cdot\text{min}^{-1}$ ,  $p<0,001$ ) und Budesonid ( $12 \text{ L}\cdot\text{min}^{-1}$ ,  $p<0,001$ ), jedoch nicht *versus* Formoterol ( $5 \text{ L}\cdot\text{min}^{-1}$ ) und diese Verbesserung hielt während der gesamten Behandlungsdauer an. Formoterol war zudem verbunden mit Placebo ( $p<0,001$ ).

Für Exazerbationen und für  $\text{FEV}_1$  wurden Interaktionsanalysen zwischen Behandlung und Geschlecht, Raucherstatus/-historie, Reversibilität oder Anwendung von ICS bei Beginn durchgeführt, um Unterschiede in der Reaktion auf die Behandlung zu untersuchen. Es gab keinen Beleg für eine Heterogenität in den Behandlungsunterschieden hinsichtlich der Primärvariablen in einer dieser Kategorien, d.h. die Ergebnisse in diesen Gruppen stimmten mit der Hauptanalyse überein.

#### Gesundheitsbezogene Lebensqualität (HRQL)

Die Baseline-Werte für den SGRQ-Gesamtscore waren in jeder Gruppe ähnlich und hoch, was auf eine schlechte HRQL hinweist (Tabelle 2). Am Ende der Run-in-Periode hatten sich die Gesamtscores um durchschnittlich 4,5 Punkte (Bereich von 3,6–4,8, Abb. 4) verbessert. Während der Behandlungsdauer fiel der Gesamtscore in der Budesonid/Formoterol-Gruppe weiter, was eine zusätzliche Verbesserung neben der während der Run-in-Phase erreichten Verbesserung darstellt. Bei der Behandlung mit Budesonid oder Formoterol konnte die anfängliche Verbesserung der HRQL erhalten werden, während sich die HRQL in der Placebo-Gruppe im Vergleich zu den Ursprungswerten (Prä-Run-in-Phase) verschlechterte (Abb.4).

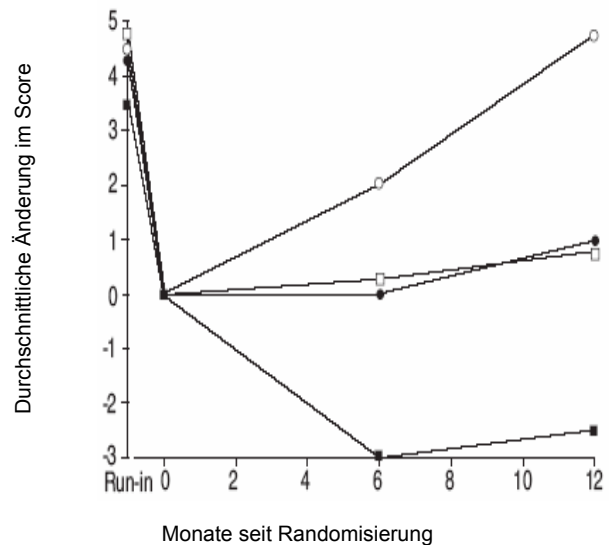

Abb. 4. – Zeitverlauf der Änderung im St Georges Respiratory Questionnaire. Gesamtscores in Zusammenhang mit dem ersten Besuch gemessen bei den Klinikbesuchen. Nach 12 Monaten, Budesonid/Formoterol (●) *versus* Budesonid (○),  $p=0,001$ ; Budesonid/Formoterol *versus* Formoterol (□),  $p=0,014$ ; Budesonid *versus* Placebo (○),  $p<0,05$ ; Formoterol *versus* Placebo,  $p<0,01$ ; und Budesonid/Formoterol *versus* Placebo,  $p<0,001$ .

Demzufolge haben alle aktiven Therapien den Gesamtscore *versus* Placebo verbessert, wobei die größte Verbesserung bei der Behandlung mit Budesonid/Formoterol zu verzeichnen war (Differenzen bei 12 Monaten von -7,5, -3,0 und -4,1 *versus* Placebo für Budesonid/Formoterol bzw. Budesonid bzw. Formoterol). In ähnlicher Weise verbesserten sich die Scores auf den Gebieten Symptome, Aktivität und Wirkung jeweils um  $\geq 5,5$  Punkte bei den mit Budesonid/Formoterol behandelten Patienten im Vergleich zu denen in der Placebo-Gruppe ( $p<0,01$ ). Darüber hinaus zeigte die Budesonid/Formoterol-Gruppe Verbesserungen *versus* den Monokomponenten in der Aktivität (Änderungen von -3,6 *versus* Budesonid und -3,5 *versus* Formoterol, beide  $p<0,05$ ) und in den Wirkungen (Änderungen von -5,7 ( $p<0,001$ ) *versus* Budesonid und -3,7 ( $p<0,05$ ) *versus* Formoterol), jedoch nicht auf dem Gebiet der Symptome (-2,8 *versus* Budesonid und -0,6 *versus* Formoterol).

#### Symptome

Budesonid/Formoterol und Formoterol verbesserten den Gesamt-Symptomscore und die einzelnen Symptom-Scores für Kurzatmigkeit, Engegefühl im Brustraum und nächtliches Erwachen im Vergleich zu Placebo. Budesonid verbesserte gegenüber Placebo zudem den Score betreffend des nächtlichen Erwachens. Keine der Behandlungsmethoden sorgte für eine deutliche Verbesserung des Husten-Scores. Die Durchschnittsdaten für Änderungen in den Symptom-Scores von der Run-in-Periode bis zum Behandlungsende und die Unterschiede zwischen den Gruppen sind in Tabelle 4 dargestellt.

#### Anwendung von Akutmedikation

Budesonid/Formoterol hat die Anwendung lindernder Medikamente deutlich um 0,8 Inhalationen pro Tag *versus* sowohl Budesonid als auch Placebo (beide  $p<0,001$ ), und um 0,3 Inhalationen pro Tag *versus* Formoterol ( $p<0,05$ ) reduziert und Formoterol verringerte die Einnahme von lindernden Medikamenten um 0,4 Inhalationen pro Tag *versus* Placebo ( $p<0,01$ ). Budesonid hatte als Monotherapie im Vergleich zu Placebo keine Auswirkung auf diese Variable.

#### Verträglichkeit

**Tabelle 4 – Durchschnittliche Änderungen von der Run-in-Periode bis zum Ende der Behandlung in Symptom scores**

|                    | Gesamt-Symptom-score (0-16) | Kurzatmigkeit Score (0-4) | Engegefühl im Brustraum Score (0-4) | Husten Score (0-4) | Nächtliches Erwärmen Score (0-4) |
|--------------------|-----------------------------|---------------------------|-------------------------------------|--------------------|----------------------------------|
| B/F versus Placebo | -0,56 (-0,89–0,24)          | -0,21 (-0,32–0,10)        | -0,16 (-0,26–0,05)                  | -0,07 (-0,17–0,03) | -0,16 (-0,27–0,05)               |
| p-Wert             | <0,001                      | <0,001                    | 0,004                               | 0,180              | 0,004                            |
| B/F versus B       | -0,26 (-0,58–0,07)          | -0,12 (-0,23–0,01)        | -0,09 (-0,20–0,01)                  | -0,02 (-0,12–0,08) | -0,05 (-0,16–0,06)               |
| p-Wert             | 0,120                       | 0,040                     | 0,080                               | 0,651              | 0,361                            |
| B/F versus F       | -0,02 (-0,35–0,30)          | 0,00 (-0,11–0,11)         | -0,01 (-0,12–0,09)                  | -0,02 (-0,12–0,08) | -0,04 (-0,15–0,07)               |
| p-Wert             | 0,891                       | 0,946                     | 0,788                               | 0,705              | 0,463                            |
| B versus Placebo   | -0,30 (-0,63–0,02)          | -0,09 (-0,20–0,02)        | -0,06 (-0,17–0,04)                  | -0,05 (-0,15–0,05) | -0,11 (-0,21–0,00)               |
| p-Wert             | 0,067                       | 0,100                     | 0,238                               | 0,372              | 0,049                            |
| F versus Placebo   | -0,54 (-0,87–0,21)          | -0,21 (-0,32–0,10)        | -0,14 (-0,25–0,04)                  | -0,05 (-0,15–0,05) | -0,12 (-0,22–0,01)               |
| p-Wert             | 0,001                       | <0,001                    | 0,008                               | 0,335              | 0,033                            |

Daten werden als Durchschnittswerte präsentiert (95% Vertrauensintervall), sofern nicht anders angegeben. B: Budesonid; F: Formoterol.

Es wurden keine weiteren Verträglichkeitsprobleme für Budesonid/Formoterol in dieser Studie im Vergleich zu dem, was bereits zuvor über Budesonid/Formoterol, Budesonid und Formoterol bei COPD und Asthma bekannt war, festgestellt. Die durchschnittliche Anzahl von AEs, die bei der Behandlung mit Budesonid/Formoterol auftraten, unterschied sich nicht von denen bei der Behandlung mit Placebo (5, 5, 6 und 5 AEs je 1.000 Behandlungstage für die Gruppen, die mit Budesonid/Formoterol, Budesonid, Formoterol beziehungsweise Placebo behandelt wurden), und die am häufigsten aufgetretenen AEs waren in allen Behandlungsgruppen ähnlich (Tabelle 5). Die geringste Anzahl an Abbrüchen trat in der Budesonid/Formoterol-Gruppe auf (Tabelle 1) und die geringste Anzahl schwerer AEs mit Ausnahme von Todesfällen ereignete sich in den Gruppen Budesonid/Formoterol und Placebo (65, 88, 85 und 66 in den Gruppen Budesonid/Formoterol, Budesonid, Formoterol beziehungsweise Placebo). Die Anzahl schwerwiegender AEs im Zusammenhang mit COPD betrug 40, 40, 55 und 38 in den Gruppen Budesonid/Formoterol, Budesonid, Formoterol beziehungsweise Placebo. Die Zahl der Todesfälle betrug 5, 6, 13 und 5 in den Gruppen Budesonid/Formoterol, Budesonid, Formoterol beziehungsweise Placebo. Bei den meisten Todesfällen handelte es sich um Ereignisse in Zusammenhang mit COPD und nur einige wenige standen in Zusammenhang mit kardiovaskulären Ereignissen.

Diskussion

Viele Kliniker entscheiden sich bei neu zugewiesenen COPD-Patienten für eine Intensivierung ihrer Behandlung, die häufig eine Periode der Therapie mit oralen Corticoiden beinhaltet, in der Hoffnung, einzelne Personen zu finden, die auf Corticoide

ansprechen. Eine beträchtliche Anzahl an Patienten zeigt Verbesserungen der Spirometrie mit entweder einem Beta-2-Agonisten oder oralen Corticoiden, oder beiden [21]. Unglücklicherweise sagt weder der Nachweis einer "positiven" noch einer "negativen" Reaktion auf orale Corticoide bei Patienten mit schwerer COPD etwas über die zukünftige Reaktion auf eine Inhalationstherapie voraus [9]. Ob diese Verbesserungen der Lungenfunktion von Änderungen in symptomatischen Endpunkten wie der HRQL begleitet werden ist ebenso wenig untersucht worden, wie die Fähigkeit inhalativer Medikamente zum Erhalt dieser Effekte nicht bewertet worden ist, obwohl Ergebnisse aus Beobachtungsstudien darauf schließen lassen, dass zumindest ICS von Nutzen sein könnten [22]. Diese Studie zeigt, dass nach einer optimierten Behandlung mit Formoterol und oralen Corticoiden bedeutende kurzfristige Verbesserungen der Lungenfunktion (sowohl FEV<sub>1</sub> als auch PEF) und der HRQL auftraten, und dass diese Verbesserungen bei Anwendung von Budesonid und Formoterol in einem einzigen Inhalationsgerät ein Jahr lang erhalten werden können.

Dies ist die erste Studie, die zeigt, dass nach einer Intensivierung der Behandlung die Verabreichung eines ICS und eines langwirksamen Beta-2-Agonisten in einem einzigen Inhalationsgerät die Zeit bis zu einer ersten COPD-Exazerbation im Vergleich zu den Monokomponenten verlängert. Darüber hinaus stützen diese Daten in starkem Maße jüngste Studien, bei denen diese Arzneimittelbehandlungsklassen kombiniert wurden und die Therapie anfangs während der Run-in-Phase entzogen anstatt optimiert worden ist [5, 6]. Die Exazerbationsfrequenz in dieser Studie war fast identisch mit den Ergebnissen der vorherigen Studie mit Budesonid/Formoterol bei COPD-Patienten mit einer ähnlich schweren Erkrankung [5], und die Wirkungen jeder Behandlung waren in beiden Studien gleich. In dieser Studie erwies sich die Kombination Budesonid/Formoterol bei der Verhinderung von Exazerbationen als eindeutig besser als die Monokomponenten, während Budesonid eine geringe Wirkung auf Episoden hatte, wo orale Corticoide für notwendig erachtet worden waren. Die mangelnde Wirkung von Formoterol spiegelt möglicherweise eher die schwerere Natur der Episoden, die hier als Endpunkt verwendet wurden, wider (*d.h.* diejenigen, die eine medizinische Behandlung erforderten), als die "schlechten Tage", die als Surrogat für Exazerbationen in anderen Studien verwendet wurden [3]. Die Ähnlichkeiten der in diesem Dokument beschriebenen Daten mit denjenigen von SZAFRANSKI *et al.* [5] zeigen, dass eine vorherige Behandlungsoptimierung dieses Ergebnis nicht beeinflusst. Die schwerere Erkrankung der untersuchten Patienten (FEV<sub>1</sub> 36% progn) ist die wahrscheinlichste Erklärung für die größere Anzahl an Episoden, die hier im Vergleich zu anderen Studien festgestellt wurden [6, 9], eine Differenz, die die Aussagekraft der Studie zur Feststellung einer Wirkung der Behandlung erhöht. Die 24%ige Verringerung der Exazerbationen mit Budesonid/Formoterol im Vergleich zu Placebo kann lohnende Verbesserungen des Wohlergehens des Patienten erbringen. Zudem werden die Verringerungen wahrscheinlich unterschätzt, da es in der

**Tabelle 5 – Die am häufigsten genannten unerwünschten Ereignisse (AEs)**

|                        | B/F     | B       | F        | Placebo  |
|------------------------|---------|---------|----------|----------|
| Patienten n            | 254     | 257     | 255      | 256      |
| COPD <sup>#</sup>      | 48 (19) | 62 (24) | 73 (29)  | 79 (31)  |
| Atemweginfektion       | 36 (14) | 34 (13) | 33 (13)  | 24 (9)   |
| Fieber                 | 5 (2)   | 9 (4)   | 11 (4)   | 2 (1)    |
| Dyspnoe                | 5 (2)   | 5 (2)   | 12 (5)   | 5 (2)    |
| Rückenschmerzen        | 8 (3)   | 4 (2)   | 6 (2)    | 7 (3)    |
| Pharyngitis            | 7 (3)   | 5 (2)   | 8 (3)    | 5 (2)    |
| Schmerzen im Brustraum | 8 (3)   | 4 (2)   | 6 (2)    | 5 (2)    |
| Hypertonie             | 6 (2)   | 9 (4)   | 3 (1)    | 5 (2)    |
| Pneumonie              | 8 (3)   | 5 (2)   | 7 (3)    | 2 (1)    |
| Rhinitis               | 11 (4)  | 3 (1)   | 6 (2)    | 1 (<0,5) |
| Dysphonie              | 5 (2)   | 5 (2)   | 1 (<0,5) | 1 (<0,5) |
| Moniliasis             | 4 (2)   | 4 (2)   | 2 (1)    | 0 (0)    |

Die Daten werden, sofern nicht anders angegeben, als n (%) von Patienten, die mindestens eine AE nach der ersten Dosis des zu untersuchenden Produktes gemeldet haben, dargestellt. B: Budesonid; F: Formoterol; COPD: chronisch obstruktive Lungenerkrankung. <sup>#</sup>: COPD wurde nur dann als AE angegeben, wenn das COPD-Symptom (Bronchitis, Mucus, Husten, erhöhte Sputumproduktion, Kurzatmigkeit, Keuchen, Dyspnoe) schwerwiegend war (führte zum Tode, war lebensbedrohlich, erforderte Hospitalisierung oder verlängerte eine bestehende Hospitalisierung, oder hatte eine dauernde oder bedeutende Invalidität/Geschäftsunfähigkeit zur Folge), oder für den Patienten zu einem Abbruch der Studie führte.

Budesonid/Formoterol-Gruppe die wenigsten Abbrüche gab. Es ist wahrscheinlich, dass die am schwersten erkrankten Personen zuerst ausgeschieden sind, was möglicherweise zu einer geringeren Anzahl an Exazerbationen in den anderen Gruppen führte. In gewissem Maße trifft dieser systematische Fehler ebenso auf die Differenzen in der Lungenfunktion und der HRQL zu.

Budesonid/Formoterol konnte die FEV<sub>1</sub> über das gesamte Studienjahr auf dem Niveau der Run-in-Periode halten. Im Gegensatz dazu ging die Lungenfunktion (sowohl FEV<sub>1</sub> als auch PEF) bei Patienten, die entweder mit Budesonid oder mit Placebo behandelt wurden, nach einem Monat auf den Baseline-Wert zurück und, wie aus den PEF-Daten von den Tages-Diary-Cards ersichtlich, trat diese Veränderung innerhalb von 2 Wochen nach Randomisierung auf. Zahlenmäßig lagen die Formoterol-Daten zwischen denen der anderen Behandlungsarme, die Werte jedoch waren bedeutend kleiner als diejenigen, die bei Anwendung von Budesonid/Formoterol gemessen wurden. Das Ausmaß der spirometrischen Veränderungen beim Vergleich von Budesonid/Formoterol mit Placebo und den Monokomponenten war fast identisch mit derjenigen, die bei Einführung der Kombinationstherapie nach einer Zeit des Behandlungsabbruchs [5, 6] beobachtet wurde. Die PEF-Daten machen zudem deutlich, dass der klinische Nutzen der Behandlungsoptimierungen innerhalb von zwei Wochen nach Einstellung der intensivierten Therapie bei allen Patienten, die nicht Budesonid/Formoterol nahmen, nachließ.

Budesonid/Formoterol sorgte für deutliche Verbesserungen der täglichen Symptomscores im Vergleich zu Placebo, den gleichen Effekt, den auch Formoterol *versus* Placebo hatte (mit Ausnahme des Hustens, der unverändert blieb). Die absoluten Änderungen waren ähnlich wie die, die in der Studie von SZAFRANSKI *et al* beobachtet worden waren [5], die den gleichen Fragebogen verwendeten. Selbst bescheidene Verbesserungen der Symptomscores sorgen wahrscheinlich für eine bessere Mobilität und ein erhöhtes Maß an Aktivitäten. Jedoch gab es statistisch und klinisch bedeutende Unterschiede zwischen den Behandlungen betreffend ihrer Fähigkeit, die HRQL-Verbesserung nach einer Optimierung der Therapie zu erhalten. Die Behandlung mit der Kombination Budesonid/Formoterol war verbunden mit der größten Differenz in dem SGRQ-Gesamtscore verglichen mit Placebo, denn die minimale klinisch bedeutende Differenz von 4 Punkten [19] wurde deutlich überschritten. Verbesserungen des Gesamtscores im Vergleich zu Placebo waren ebenfalls bei der Behandlung mit Formoterol in Monotherapie klinisch bedeutend und erreichten eine klinische Relevanz bei der Behandlung mit Budesonid in Monotherapie. Die zusätzliche Wirkung von Budesonid/Formoterol auf die HRQL im Vergleich zu den Monokomponenten spiegelt wahrscheinlich die geringere Anzahl von Exazerbationen wider, die diese Patienten erlitten, da die HRQL bei Menschen mit häufigen Exazerbationen bekannterweise schlecht ist [16].

Alle aktiven Behandlungen hatten einen positiven Effekt auf die HRQL; die in der Budesonid-Gruppe beobachtete Änderung im Laufe des Jahres war fast identisch mit den Beobachtungen, die bei weniger spirometrisch beeinträchtigten Patienten in der Studie über inhalative Steroide bei chronisch obstruktiver Lungenerkrankung gemacht wurden. In dieser Studie wurden die Patienten nach einer anfänglichen Prednisolon-Therapie untersucht [9]. Die Aufnahme einer Phase der optimierten Behandlung kann die Probleme bei der Bewertung der HRQL in klinischen Studien überwinden, da diese den unmittelbaren Effekt des Entzugs von ICS reduziert, der mit häufigeren Exazerbationen einhergeht [23, 24]. Diese Vorgehensweise sollte einen realistischeren Vergleich der Wirkung der Behandlung auf die HRQL ermöglichen und überwindet den „Effekt des klinischen Versuchs“, der in dem Placebo-Arm anderer einjähriger Untersuchungen beobachtet wurde [6].

In dieser Studie wurden die AEs durch spezielle Fragen bei jedem Besuch überwacht. Es wurden während der 12-monatigen Behandlungsdauer keine neuen Verträglichkeitsprobleme in Verbindung mit der Behandlung mit Budesonid/Formoterol festgestellt. Das Auftreten von AEs in Zusammenhang mit COPD war in der Budesonid/Formoterol-Gruppe im Vergleich zu den

anderen Gruppen geringer, und überall wurde ein geringes Auftreten von Heiserkeit und Moniliasis gemeldet.

In dieser Studie wurden keine Daten über die Knochendichte gesammelt, obwohl die verwendete Budesonid-Dosis diese Variable während einer 3-jährigen Behandlungszeit bei Patienten mit weniger fortgeschrittener COPD nicht beeinträchtigte [25]. Wie bei Untersuchung von COPD-Patienten mit dieser Schwere der Krankheit erwartet, traten einige Todesfälle auf. Die Anzahl der aufgetretenen schwerwiegenden AEs und Todesfälle war in der Formoterol-Behandlungsgruppe am größten und die meisten dieser Ereignisse standen mit der COPD in Zusammenhang. Eine Untersuchung der einzelnen Ursachen für die Todesfälle gab keine Erklärung für die offensichtliche Differenz zwischen den Gruppen, und in einer früheren Studie mit ähnlicher Patientengruppe wurde während der Formoterol-Behandlung ohne ICS keine Erhöhung der Mortalität festgestellt [5]. Umgekehrt wurde in einigen kürzlich veröffentlichten Studien mit als Monotherapie angewendeten Bronchodilatoren eine erhöhte Schwere der Krankheit/Mortalität gemeldet [26-28]. Diese Beobachtungen lassen gemeinsam mit der potenziellen Schwere schwerer Exazerbationen den Schluss zu, dass eine Kombination eines langwirksamen Bronchodilators mit einem ICS bei Patienten mit diesem Schweregrad der COPD besonders geeignet sein könnte.

Die Gründe für die verbesserte Wirksamkeit von Budesonid/Formoterol sind noch nicht klar, obwohl Corticoide die Zahl der Beta-2-Rezeptoren auf der Zellmembran erhöhen und Beta-2-Agonisten möglicherweise die nukleäre Translokation von Glucocorticoid-Rezeptoren erhöhen [29]. Es scheint zudem, dass Formoterol und Budesonid in Kombination eine bessere Wirkung auf die Reduzierung der Proliferation der glatten Atemwegmuskeln haben, als wenn jedes der Medikamente in Monotherapie verabreicht wird, was ein Ergebnis der synchronisierten Zellsignalisierung ist [30]. Klinisch scheint jedes der Medikamente etwas zu der kombinierten Wirkung mit der Verbesserung der Symptome, der Lungenfunktion (FEV<sub>1</sub>, PEF) und der HRQL in Verbindung mit Formoterol beizutragen, was ergänzt wird durch die mit Budesonid festgestellte Verringerung der Exazerbationen und der besseren HRQL. Ob diese Wirkungen lediglich additiv sind oder es tatsächlich zu wahren Synergien kommt, kann hier nicht festgestellt werden, aber die Differenz beim Behandlungsabbruch zwischen den Gruppen, die Budesonid/Formoterol nahmen gegenüber den anderen Behandlungsgruppen kann wahrscheinlich mit diesen multiplen vorteilhaften Maßnahmen erklärt werden.

Diese Studie hat mehrere Implikationen zur Folge. Sie ist ein weiterer und eindeutiger Beleg für die Wirksamkeit von ICS und langwirksamen Beta-2-Agonisten auf den Gesundheitsstatus, Exazerbationen, Lungenfunktion (FEV<sub>1</sub> und PEF) und HRQL bei COPD (GOLD Stufen III und IV), und für ihren zusätzlichen klinischen Nutzen, wenn sie in einem einzigen Inhalationsgerät kombiniert werden. Zudem hat die Standardisierung der Therapie für einen Zeitraum vor Eintritt in eine klinische Langzeitstudie größere Verbesserungen des HRQL bewirkt, als bei ähnlichen Versuchen beobachtet wurde, die diese Run-in-Behandlung nicht beinhalteten. Dies ist ein neuartiger Ansatz, der möglicherweise eine einfachere Interpretation dieses Endpunktes zulässt, und weiter untersucht werden sollte.

Schließlich belegt diese Studie, dass eine Intensivierung der Behandlung bei einer stabilen chronisch obstruktiven Lungenerkrankung ein hilfreicher Weg sein könnte, das Wohlergehen des Patienten schnell zu verbessern und dass dieser Ansatz zukünftige Untersuchungen als Alternative zur schrittweisen Steigerung der Behandlungsintensität verdient.

**Danksagung** Die Autoren danken T. Bengtsson und T. Ekström für ihren Beitrag zum Studiendesign, und danken allen Prüfärzten, die Patienten an den 109 an dieser Studie beteiligten Zentren anwarben und behandelten. *Belgien* R. Deman, P.J.C. Lorimier, P. Ortmanns, D. Rozen; *Brasilien* J.C. Corrêa, A. Cruz, J.C.A. de Oliveira, C.C. Fritscher, J.R. Jardim, S. Menna Barreto, R. Stelmach, R. Stürbulov; *China* P. Chen, X. Hou, S. Niu, L. Yang, N. Zhong; *Frankreich* S. Boutet, T. Brunet, J. Igual, F. Lenique, Y. Martinat, D. Murciano, D. Muller, Y. Pacheco, H. Pegliasco, S. Taieb, P. Zuch; *Griechenland* U. Anagnostopoulou, A. Rasiadakis; *Ungarn* Z. Cseke, Á. Dévai, G. Juhász, P. Mihalik, É. Molnár, K. Puha, M. Schreiner, Z. Szalay; *Malaysia* A. Ahmad Mahayiddin; *Norwegen* A. Eivindson, G. Gerhardsen, Á. N. Hansen, S. Humerfelt, K.E. Langaker, T. Naustdal, N. Ringdal, T.J. Rødølen, A. Sundset, T. Tomala; *Polen* M. Czajkowska-Malinowska, M. Gretschel, E. Gross-Tyrkin, P. Kuna, J. Malolepszy, D. Malosek, G. Mincewicz, J. Nowak, Z. Sankowski, P. Sliwinski, T. Stelmasiak, W. Szafranski, M. Szmidt, W. Terlecka; *Portugal* J.P. Gomes, F. Maria João, A. Marques; *Südafrika* M.S. Abdool-Gafar, C.T. Bolliger, C. Duvenage; *Schweden* P. Arvidsson, P. Hellke, P. Jakobsson, Å. Johansson, G. Johansson, A. Lindberg, J. Löfvenberg, M. Lundborg, P. Montnémery, E. Piitulainen, K. Ström, M. Tandler, B. Tilling, J. Ziegler; *Taiwan* J-F. Shih, H-C. Wang, C-P. Wu; *Thailand* W. Boonsawat, A. Nana; *GB A.D.* Bremner, M. Britton, R. Brownlie, D. Brydie, T. Evans, J. Gibson, J. Gravit, P. Hardy, B. Hopwood, D. Howarth, D. Keating, K.A. Lindsay, C. Mckinnon, S. O'Hickey, N. Patel, C. Selby, P. Shearer, C. Stenton, D.G. Stoddart, N.C. Thomson, R. Weir.

**Referenzen**

1. Rennard SI, Anderson W, Zu Wallack R, et al. Use of a longacting inhaled β2-adrenergic agonist, salmeterol xinafoate, in patients with chronic obstructive pulmonary disease. *Am J Respir Crit Care Med* 2001; 163: 1087–1092.
2. Jones PW, Bosh TW. Quality of life changes in COPD patients treated with salmeterol. *Am J Respir Crit Care Med* 1997; 155: 1283–1289.
3. Dahl R, Greefhorst LA, Nowak D, et al. Inhaled formoterol dry powder versus ipratropium bromide in chronic obstructive pulmonary disease. *Am J Respir Crit Care Med* 2001; 164: 778–784.
4. Rossi A, Kristufek P, Levine BE, et al. Comparison of the efficacy, tolerability, and safety of formoterol dry powder and oral, slow-release theophylline in the treatment of COPD. *Chest* 2002; 121: 1058–1069.
5. Szafranski W, Cukier A, Ramirez A, et al. Efficacy and safety of budesonide/formoterol in the management of COPD. *Eur Respir J* 2003; 21: 74–81.
6. Calverley P, Pauwels R, Vestbo J, et al. Combined salmeterol and fluticasone in the treatment of chronic obstructive pulmonary disease: a randomised controlled trial. *Lancet* 2003; 361: 449–456.
7. Vestbo J, Sorensen T, Lange P, Brix A, Torre P, Viskum K. Long-term effect of inhaled budesonide in mild and moderate chronic obstructive pulmonary disease: a randomised controlled trial. *Lancet* 1999; 353: 1819–1823.
8. Pauwels RA, Löfdahl C-G, Laitinen LA, et al. Long-term treatment with inhaled budesonide in persons with mild chronic obstructive pulmonary disease who continue smoking. *N Engl J Med* 1999; 340: 1948–1953.
9. Burge PS, Calverley PM, Jones PW, Spencer S, Anderson JA, Maslen TK. Randomised, double blind, placebo controlled study of fluticasone propionate in patients with moderate to severe chronic obstructive pulmonary disease: the ISOLDE trial. *BMJ* 2000; 320: 1297–1303.
10. Lung Health Study Research Group. Effect of inhaled triamcinolone on the decline in pulmonary function in chronic obstructive pulmonary disease. *N Engl J Med* 2000; 343: 1902–1909.
11. Paggiaro PL, Dahle R, Bakran I, Frith L, Hollingworth K, Efthimiou J. Multicentre randomised placebo-controlled trial of inhaled fluticasone propionate in patients with chronic obstructive pulmonary disease. International COPD Study Group. *Lancet* 1998; 351: 773–780.
12. Global Initiative for Chronic Obstructive Lung Disease (GOLD). Publication no. 2701. Bethesda, National Institutes for Health, 2001 (2003 update).
13. Greening A, Ind PW, Northfield M, Shaw G. Added salmeterol versus higher-dose corticosteroid in asthma patients with symptoms on existing inhaled corticosteroid. *Lancet* 1994; 344: 219–224.
14. Pauwels RA, Löfdahl C-G, Postma DS, et al. Effect of inhaled formoterol and budesonide on exacerbations of asthma. Formoterol and Corticosteroids Establishing Therapy (FACET) International Study Group. *N Engl J Med* 1997; 337: 1405–1411.
15. Cazzola M, Di Lorenzo G, Di Perna F, Calderaro F, Testi R, Centanni S. Additive effects of salmeterol and fluticasone or theophylline in COPD. *Chest* 2000; 118: 1576–1581.
16. Seemungal TA, Donaldson GC, Paul EA, Bestall JC, Jeffries DJ, Wedzicha JA. Effect of exacerbation on quality of life in patients with chronic obstructive pulmonary disease. *Am J Respir Crit Care Med* 1998; 157: 1418–1422.
17. Quanjer PH, Tammeling GJ, Cotes JE, Pedersen OF, Peslin R, Yernault JC. Lung volumes and forced ventilatory flows. Report: working party on standardization of lung function tests in the European Community for steel and coal. Official statement of the European Respiratory Society. *Eur Respir J* 1993; 6: Suppl. 16, 5–40.
18. Jones PW, Quirk FH, Baveystock CM, Littlejohns P. A self-complete measure of health status for chronic airflow limitation. The St. George's Respiratory Questionnaire. *Am Rev Respir Dis* 1992; 145: 1321–1327.
19. Jones PW. Interpreting thresholds for a clinically significant change in health status in asthma and COPD. *Eur Respir J* 2002; 19: 398–404.
20. Committee for Proprietary Medicinal Products. Points to consider in clinical investigation of medicinal products in the chronic treatment of patients with chronic obstructive pulmonary disease (COPD). London, PMP/EWP/562/98, 1999.
21. Nisar M, Walshaw M, Earis JE, Pearson MG, Calverley PM. Assessment of reversibility of airway obstruction in patients with chronic obstructive airways disease. *Thorax* 1990; 45: 190–194.
22. Davies L, Nisar M, Pearson MG, Costello RW, Earis JE, Calverley PM. Oral corticosteroid trials in the management of stable chronic obstructive pulmonary disease. *QJM* 1999; 92: 395–400.
23. Jarad NA, Wedzicha JA, Burge PS, Calverley PMA. An observational study of inhaled corticosteroid



- withdrawal in stable chronic obstructive pulmonary disease. *Respir Med* 1999; 93: 161–166.
24. van der Valk P, Monninkhof E, van der Palen J, Zielhuis G, van Herwaarden C. Effect of
  25. Johnell O, Pauwels R, Loftholm C-G, *et al.* Bone mineral density in patients with chronic obstructive pulmonary disease treated with budesonide Turbuhaler. *Eur Respir J* 2002; 19: 1058–1063.
  26. Ringbaek T, Viskum K. Is there any association between inhaled ipratropium and mortality in patients with COPD and asthma? *Respir Med* 2003; 97: 264–272.
  27. van der Valk P, Monninkhof E, van der Palen J, Zielhuis G, van Herwaarden C. Effect of discontinuation of inhaled corticosteroids in patients with chronic obstructive pulmonary disease. *Am J Respir Crit Care Med* 2002; 166: 1358–1363.
  28. O'Brien A, Russo-Magno P, Karki A, *et al.* Effects of withdrawal of inhaled steroids in men with severe irreversible airflow obstruction. *Am J Respir Crit Care Med* 2001; 164: 365–371.
  29. Barnes PJ. Scientific rationale for inhaled combination therapy with long-acting  $\beta$ 2-agonists and corticosteroids. *Eur Respir J* 2002; 19: 182–191.
  30. Roth M, Johnson PR, Rudiger JJ, *et al.* Interaction between glucocorticoids and  $\beta$ 2-agonists on bronchial airway smooth muscle cells through synchronised cellular signalling. *Lancet* 2002; 360: 1293–1299.
